# Supplementary material
Source: MDPI journal article supplement (https://www.mdpi.com/2073-4441/13/14/1974)
Supplement: s1 [file s1]

Supplementary Data

# Reactivation of Frozen Stored Microalgal-Bacterial Granular Sludge under Aeration and Non-Aeration Conditions

Yao Shen <sup>1</sup>, Lin Zhu <sup>1</sup>, Bin Ji <sup>1,\*</sup>, Siqi Fan <sup>1</sup>, Yabin Xiao <sup>1</sup> and Yingqun Ma <sup>2,\*</sup>

<sup>1</sup> Department of Water and Wastewater Engineering, Wuhan University of Science and Technology, Wuhan 430065, China; shy\_13247189423@sina.com (Y.S.); zhuwuster@163.com (L.Z.); a794727614@sina.com (S.F.); xiaoyabing9697@sina.com (Y.X.)

<sup>2</sup> School of Chemical Engineering and Technology, Xi'an Jiaotong University, Xi'an 710049, China

\* Correspondence: binji@wust.edu.cn (B.J.); Yingqun\_Ma@xjtu.edu.cn (Y.M.)

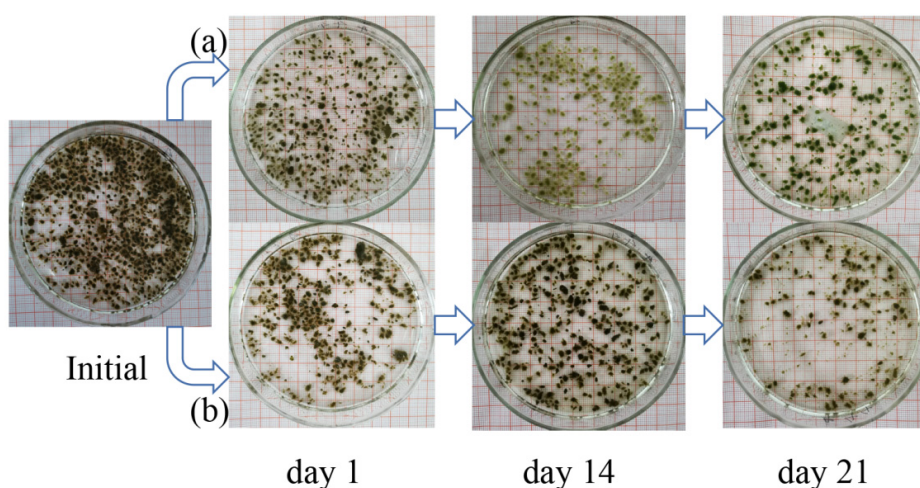

**Figure S1.** Variation in morphological appearances of microalgal-bacterial granular sludge (a) Aerated PBR; (b) Non-aerated PBR during the reactivation process.

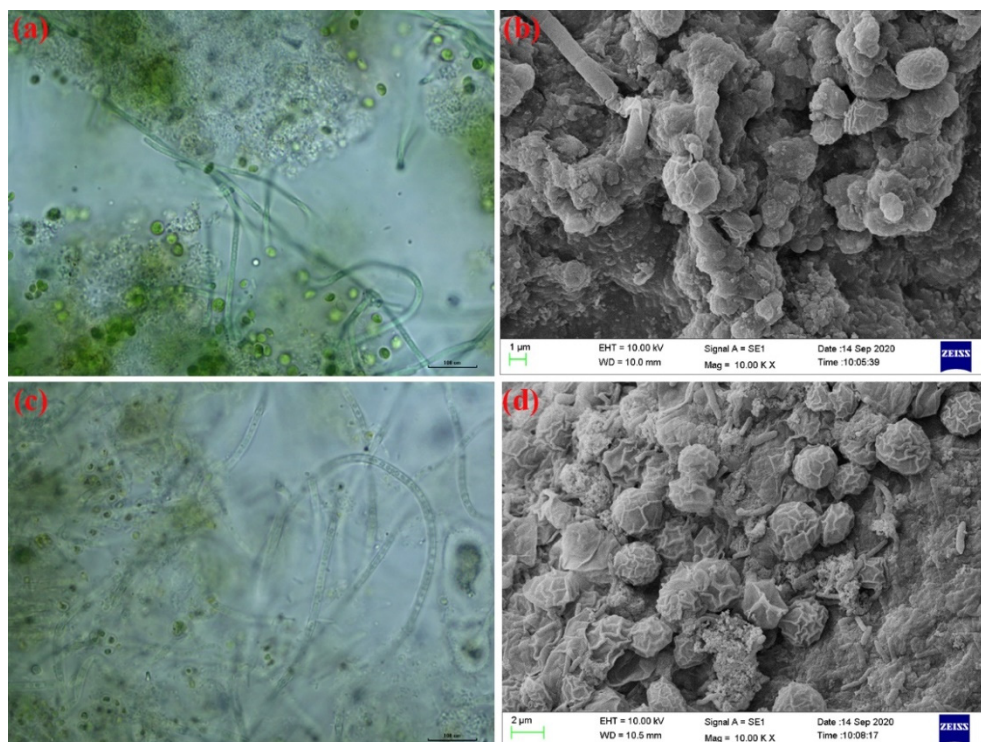

**Figure S2.** Microbial community reflected by microscope and SEM of microalgal-bacterial granules. Aerated PBR: (a) microscope; (b) SEM. Non-aerated PBR: (c) microscope; (d) SEM

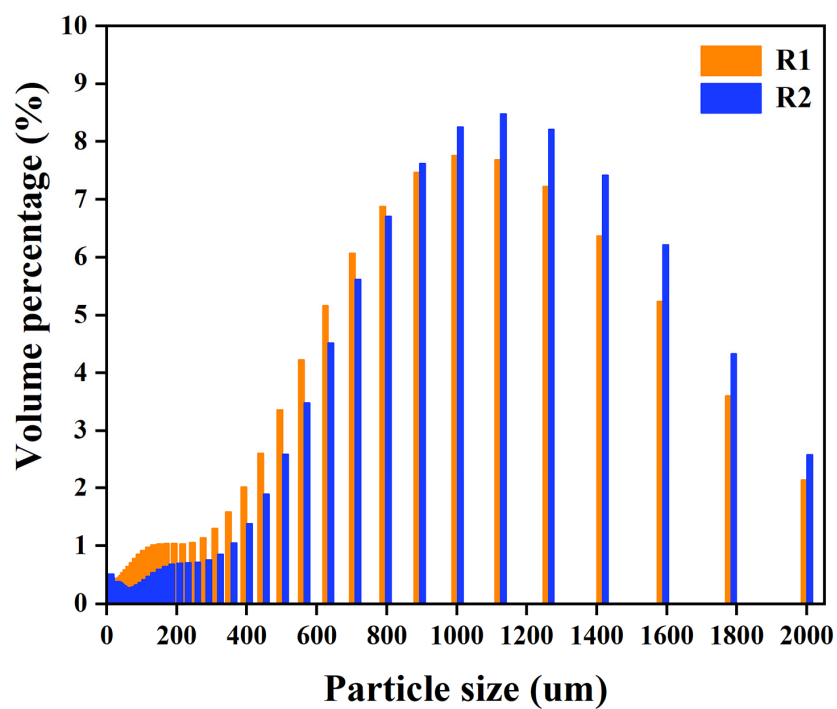

**Figure S3.** Particle size distributions of microalgal-bacterial granules after reactivation. (R1: Aeration; R2: Non-aeration).
